# Supplementary material for: Photophysical properties of ternary rare earth (Sm3+, Eu3+) centered hybrids with N-heterocyclic modified Si-O bridge and terminal ligands
Source: Royal Society of Chemistry journal article supplement (doi:10.1039/c0pp00332h), 2011-01-21
Supplement: c0pp00332h.pdf [file c0pp00332h.pdf]

## Supporting Information:

**Table S1** Assignments of the main infrared absorption bands for Phen-Si-Eu, Phen-Si-Eu-NA, Phen-Si-Eu-PMMA, Phen-Si-Eu-PVP, Phen-Si-Sm, Phen-Si-Sm-NA, Phen-Si-Sm-PMMA and Phen-Si-Sm-PVP

| Hybrid materials | $\nu(\text{CONH})$ | $\nu(\text{NO}_3^-)$ | $\nu(\text{Si-O})$ | $\nu(\text{Si-C})$ |
|------------------|--------------------|----------------------|--------------------|--------------------|
| Phen-Si-Eu       | 1657               | 1381                 | 1058-1140          | 1205               |
| Phen-Si-Eu-NA    | 1652               | 1387                 | 1040-1111          | 1182               |
| Phen-Si-Eu-PMMA  | 1652               | 1381                 | 1057-1122          | 1193               |
| Phen-Si-Eu-PVP   | 1664               | 1387                 | 1052-1105          | 1204               |
| Phen-Si-Sm       | 1657               | 1387                 | 1046-1134          | 1199               |
| Phen-Si-Sm-NA    | 1646               | 1387                 | 1028-1111          | 1175               |
| Phen-Si-Sm-PMMA  | 1652               | 1387                 | 1046-1105          | 1199               |
| Phen-Si-Sm-PVP   | 1658               | 1392                 | 1046-1134          | 1205               |

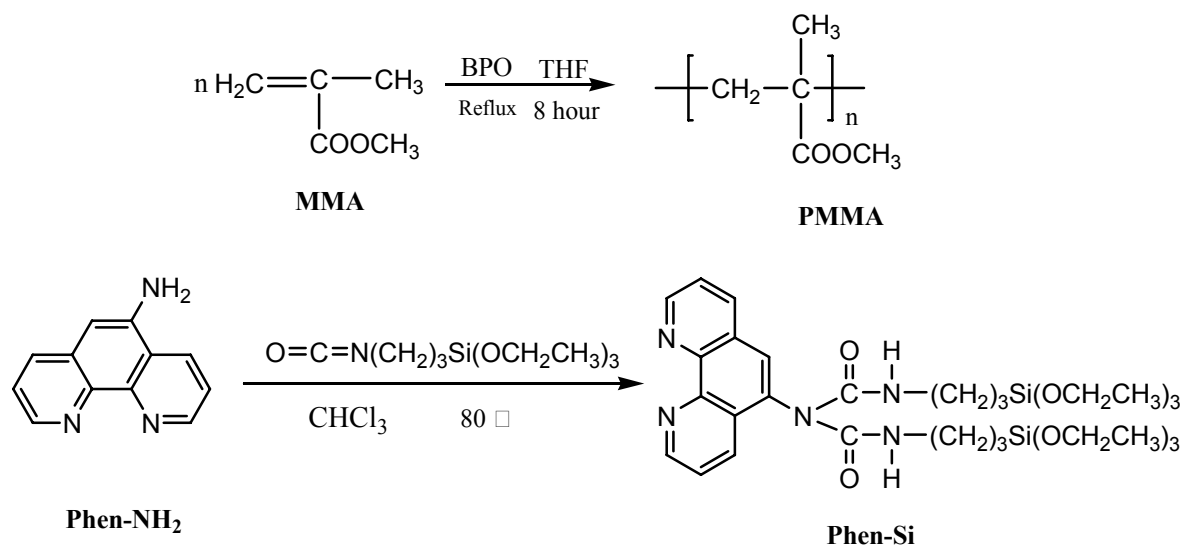

**Figure S1** Scheme of the synthesis process of the precursor Phen-Si, polymer PMMA

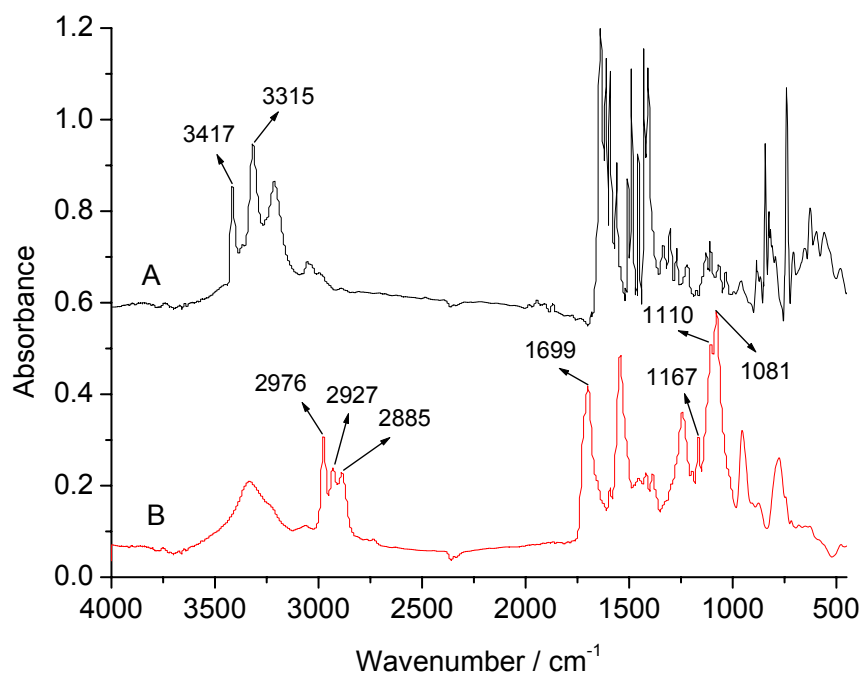

**Figure S2** FTIR spectra of the free ligand (A) Phen-NH<sub>2</sub> and the precursor (B) Phen-Si.

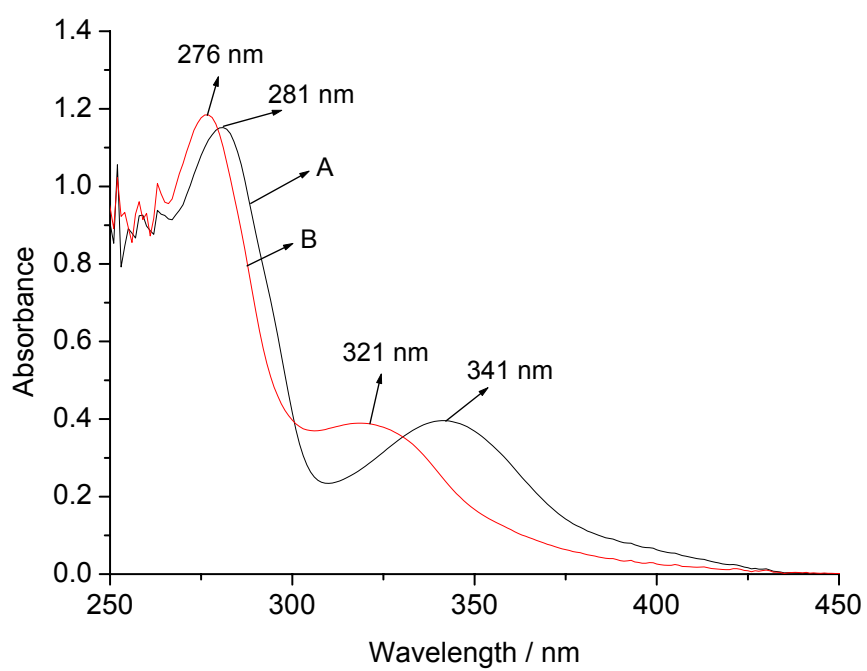

**Figure S3** Ultraviolet absorption spectra of (A) Phen-NH<sub>2</sub> and (B) Phen-Si.

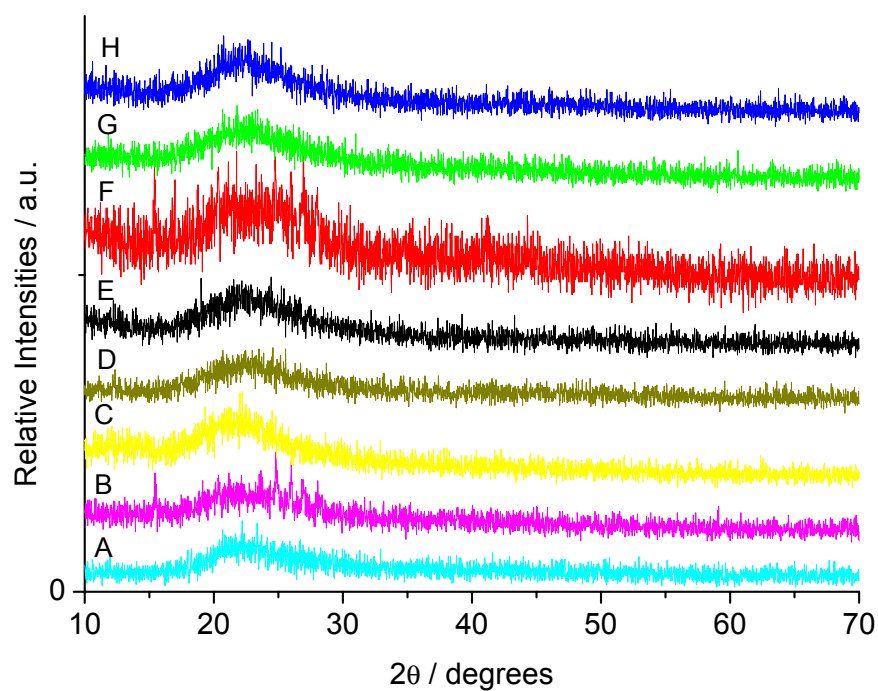

**Figure S4** X-ray diffraction patterns of the hybrid materials (A) Phen-Si-Sm, (B) Phen-Si-Sm-NA, (C) Phen-Si-Sm-PMMA, (D) Phen-Si-Sm-PVP, (E) Phen-Si-Eu, (F) Phen-Si-Eu-NA, (G) Phen-Si-Eu-PMMA and (H) Phen-Si-Eu-PVP.
